# Supplementary material
Source: Royal Society of Chemistry journal article supplement (doi:10.1039/d6mh00694a)
Supplement: d6mh00694a2.pdf [file d6mh00694a2.pdf]

## Supplementary Information

1  
2  
3  
4  
5  
6  
7  
8  
9  
10  
11  
12  
13  
14  
15  
16  
17  
18  
19  
20  
21  
22  
23  
24  
25  
26  
27

### **Monolithic additive manufacturing of fluid-structure coupled architected cellular mechanical system for rate-adaptive enhanced energy dissipation**

*Jawad Ahmad , Valerii Zudov, Mayur Jiyalal Prajapati, Marat Dosaev, Bing Joe Hwang, Wei-Nien Su, Cho-Pei Jiang, Jeng-Ywan Jeng \**

## 28 Section S1: Abaqus Simulation

29 The CMS was modeled using Abaqus/CAE © 2024 to numerically simulate the actual experimental  
 30 compression setup. The unit cell CMS was meshed with modified linear tetrahedron element (C3D4)  
 31 with a mesh size of 1 mm while the fluid domain was meshed with 0.9 mm. TPU was modeled as a  
 32 hyperelastic material (density=  $1.12 \times 10^{-9}$  Tons/mm<sup>3</sup>) and based on the tensile test conducted on dog-  
 33 bone specimen, the second order Ogden strain energy density function was chosen for it. The silicon  
 34 oil was treated as a nearly incompressible inviscid Newtonian fluid using continuum pseudo particles  
 35 (PC3D elements) using SPH approach. Its density was  $9.4 \times 10^{-10}$  Tons/mm<sup>3</sup>, viscosity  $1 \times 10^{-6}$  MPa.s,  
 36 speed of sound ( $c_0 = 9.85 \times 10^5$  mm s<sup>-1</sup>) and Hugoniot coefficient  $S=0$ , Gruneisen parameter  $\Gamma_0=0$ .  
 37 Analytical rigid plates were chosen at the top and bottom boundaries with tangential penalty (Friction  
 38 Coefficient=0.3) and hard normal contact to replicate the experimental compression conditions. The  
 39 bottom plate was fixed while top plate was moved downward for compression.

## 40 Section S2: Mechanical response under quasi static compression

41 Table S2.1 Quasi-static flow regime and times scale analysis

| Parameter                      | Value                                        | Parameter                      | Value                                        |
|--------------------------------|----------------------------------------------|--------------------------------|----------------------------------------------|
| Orifice diameter               | 1.5mm, 3.0mm                                 | Orifice length                 | 0.669 mm                                     |
| $\rho$ (water)                 | 1000 kg/m <sup>3</sup>                       | $\rho$ (silicone oil)          | 970 kg/m <sup>3</sup>                        |
| $\mu$ (water) 0.001 Pa. s      | $\nu=1.0 \times 10^{-6}$ m <sup>2</sup> /s   | $\mu$ (0.1 Pa. s silicone oil) | $\nu=1.031 \times 10^{-4}$ m <sup>2</sup> /s |
| $\mu$ (1.0 Pa. s silicone oil) | $\nu=1.031 \times 10^{-3}$ m <sup>2</sup> /s | $\Delta x$                     | 8.5 mm                                       |

42

43 Table S2.2 Reynolds number ( $Re=\rho v d/\mu$ ) for d=1.5 mm

| Speed (mm/min) | V (mm/s) | $Re$ (water) | $Re$ (0.1 Pa. s)      | $Re$ (1.0 Pa. s)      |
|----------------|----------|--------------|-----------------------|-----------------------|
| 10             | 0.166    | 0.25         | $2.43 \times 10^{-3}$ | $2.43 \times 10^{-4}$ |
| 500            | 8.33     | 12.5         | 0.12                  | 0.012                 |
| 1000           | 16.66    | 25           | 0.24                  | 0.024                 |

44 Table S2.3 Reynolds number ( $Re=\rho v d/\mu$ ) for d=3.0 mm

| Speed (mm/min) | V (mm/s) | $Re$ (water) | $Re$ (0.1 Pa. s) | $Re$ (1.0 Pa. s) |
|----------------|----------|--------------|------------------|------------------|
| 1000           | 16.66    | 50           | 0.49             | 0.049            |

45

46 Table S2.4 Viscous diffusion time scale:  $\tau_{\text{viscous}} = d^2/\nu$

| Fluid     | $\tau_{\text{viscous}}$ (s) for d=1.5 mm | $\tau_{\text{viscous}}$ (s) for d=3.0 mm |
|-----------|------------------------------------------|------------------------------------------|
| 1.0 Pa. s | $2.18 \times 10^{-3}$                    | $8.73 \times 10^{-3}$                    |
| 0.1 Pa. s | $2.18 \times 10^{-2}$                    | $8.73 \times 10^{-2}$                    |
| water     | 2.25                                     | 9                                        |

47 Table S2.5 Time scale ratio:  $\tau_{\text{viscous}}/\tau_{\text{compression}}$  (d=1.5 mm)

| Fluid     | $\tau_{\text{compression}}$ at 10 mm/min | Ratio                | $\tau_{\text{compression}}$ at 1000 mm/min | Ratio  |
|-----------|------------------------------------------|----------------------|--------------------------------------------|--------|
| 1.0 Pa. s | 51                                       | $4.3 \times 10^{-5}$ | 0.51                                       | 0.0043 |
| 0.1 Pa. s | 51                                       | $4.3 \times 10^{-4}$ | 0.51                                       | 0.043  |
| water     | 51                                       | 0.044                | 0.51                                       | 4.41   |

48

49 **Table S2.6 Time scale ratio:  $\tau_{\text{viscous}}/\tau_{\text{compression}}$  (d=3.0 mm)**

| Fluid     | $\tau_{\text{compression}}$ at 10 mm/min | Ratio                 | $\tau_{\text{compression}}$ at 1000 mm/min | Ratio  |
|-----------|------------------------------------------|-----------------------|--------------------------------------------|--------|
| 1.0 Pa. s | 51                                       | $1.71 \times 10^{-4}$ | 0.51                                       | 0.0171 |
| 0.1 Pa. s | 51                                       | $1.71 \times 10^{-3}$ | 0.51                                       | 0.171  |
| water     | 51                                       | 0.176                 | 0.51                                       | 17.6   |

50

51 **Table S2.7: Energy Metrics**

| Sample Type | Compression Speed (mm/min) | $K$ (N/mm) | $F_{\text{peak}}$ (N) | $EA$ (mJ) | $SEA$ (mJ/g) |
|-------------|----------------------------|------------|-----------------------|-----------|--------------|
| Empty       | 10                         | 71.64      | 624.52                | 2270      | 113.5        |
|             | 50                         | 73.78      | 656.53                | 2406      | 120.3        |
|             | 100                        | 75.76      | 670                   | 2421      | 121.05       |
|             | 250                        | 81.56      | 694.35                | 2563      | 128.15       |
|             | 500                        | 82.16      | 765.46                | 2784      | 139.2        |
|             | 750                        | 82.55      | 848.44                | 3052      | 152.6        |
|             | 1000                       | 84.96      | 980.74                | 3523      | 176.15       |
| Filled      | 10                         | 74.98      | 736.55                | 2628      | 100.03       |
|             | 50                         | 78.18      | 747.53                | 2726      | 103.76       |
|             | 100                        | 80.85      | 768.5                 | 2853      | 108.60       |
|             | 250                        | 85.0       | 822.09                | 3131      | 119.18       |
|             | 500                        | 90.63      | 896.63                | 3509      | 133.57       |
|             | 750                        | 95.16      | 979.25                | 3930      | 149.60       |
|             | 1000                       | 102.21     | 1099.89               | 4612      | 175.56       |

52

53 **Table S2.8: Damping Metrics**

| Sample Type | Compression Speed (mm/min) | $ED$ (mJ) | $SED$ (J/kg) | $Loss$ factor ( $\zeta$ ) | $F_d = F_{\text{load}} - F_{\text{unload}}$ @ 6mm |
|-------------|----------------------------|-----------|--------------|---------------------------|---------------------------------------------------|
| Empty       | 10                         | 328       | 16.4         | 0.023                     | 42.65                                             |
|             | 50                         | 368       | 18.4         | 0.024                     | 47.62                                             |
|             | 100                        | 381       | 19.05        | 0.025                     | 48.55                                             |
|             | 250                        | 400       | 20           | 0.025                     | 53.54                                             |

|        |      |      |       |       |        |
|--------|------|------|-------|-------|--------|
|        | 500  | 438  | 21.9  | 0.025 | 60.06  |
|        | 750  | 495  | 24.75 | 0.026 | 69.48  |
|        | 1000 | 634  | 31.7  | 0.028 | 84.1   |
|        | 10   | 379  | 14.42 | 0.022 | 47.81  |
|        | 50   | 470  | 17.89 | 0.027 | 63.2   |
|        | 100  | 576  | 21.92 | 0.032 | 81.89  |
| Filled | 250  | 825  | 31.40 | 0.041 | 133.4  |
|        | 500  | 1135 | 43.20 | 0.051 | 199.9  |
|        | 750  | 1413 | 53.78 | 0.057 | 253.03 |
|        | 1000 | 1799 | 68.48 | 0.062 | 302.81 |

54

### 55 Section S3: Mechanical response under dynamic compression

#### 56 Table S3.1 Dynamic flow regime and times scale analysis

57 Reynolds number under dynamic loading (1.0 Pa. s, d=1.5 mm)

58 Parameters ( $\rho=970 \text{ kg/mm}^3$ ),  $\mu=1.0 \text{ Pa. s}$ ,  $A=0.00425$ )

| Frequency (Hz) | V (m/s) | Re    |
|----------------|---------|-------|
| 1.0            | 0.0267  | 0.039 |
| 2.5            | 0.068   | 0.097 |

59

#### 60 Table S3.2 Time scale ratio: $\tau_{\text{viscous}}/\tau_{\text{compression}}$ (d=1.5 mm)

| Frequency (Hz) | T/2 (s) | $\tau_{\text{viscous}}$ (s) for d=1.5 mm | Ratio                 |
|----------------|---------|------------------------------------------|-----------------------|
| 1.0            | 0.5     | $2.18 \times 10^{-3}$                    | $4.37 \times 10^{-3}$ |
| 2.5            | 0.2     | $2.18 \times 10^{-3}$                    | $1.09 \times 10^{-2}$ |

61

#### 62 Table S3.3 Time scale ratio: $\tau_{\text{viscous}}/\tau_{\text{compression}}$ (d=3.0 mm)

| Frequency (Hz) | T/2 (s) | $\tau_{\text{viscous}}$ (s) for d=3.0 mm | Ratio                 |
|----------------|---------|------------------------------------------|-----------------------|
| 1.0            | 0.5     | $8.73 \times 10^{-3}$                    | $1.75 \times 10^{-2}$ |
| 2.5            | 0.2     | $8.73 \times 10^{-3}$                    | $4.37 \times 10^{-2}$ |

63

#### 64 Table S3.4 Dynamics Metrics for 6<sup>th</sup> cycle

| Sample Type | Frequency (Hz) | $F_{\text{max}}(N)$ | ED (mJ) | SED (mJ) | $\zeta$ |
|-------------|----------------|---------------------|---------|----------|---------|
| Empty       | 1.0            | 701.66              | 442.54  | 22.19    | 0.028   |
|             | 2.5            | 792.49              | 521.02  | 26.44    | 0.033   |
| Filled      | 1.0            | 790.98              | 995.09  | 37.87    | 0.058   |
|             | 2.5            | 1086.90             | 1391.96 | 52.98    | 0.061   |

65 Table S3.5 Comparative benchmark of the present CMS against prior related works

| Reference                  | Structure                     | Mechanism                                  | Rate-adaptive                                                                                   | Fabrication/assembly                 | Cyclic stability                                 | Key limitation                                                                    |
|----------------------------|-------------------------------|--------------------------------------------|-------------------------------------------------------------------------------------------------|--------------------------------------|--------------------------------------------------|-----------------------------------------------------------------------------------|
| Corvi & Collini et al. [1] | STF filled TPMS               | Bulk STF presence                          | i) Peak acceleration reduction<br>ii) Energy absorption enhancement by 85% at high strain rates | 3D printing + manual fluid injection | Not tested                                       | No benefit under quasistatic or low frequency loading, no loss factor reported    |
| Shi et al. [2]             | PA12-ONSH dome                | Orifice flow                               | EA=100-150 mJ at 1-6 mm/s                                                                       | Manual assembling                    | Tested for 18 cycles                             | Require assembly and sealing                                                      |
| Li et al. [3]              | Interwind friction based      | Dry friction                               | EA≈10 KJ/kg                                                                                     | Manual assembling                    | >200 cycles                                      | Wear of sliding interfaces, multi-component assembly                              |
| Prajapati et al [4]        | Closed cell lattice           | Bulk silicon oil present, no directed flow | EA=60-118 J (quasi-static)                                                                      | Combined printing and filling        | no cyclic durability data                        | No dedicated orifice, no cyclic durability data, no velocity proportional damping |
| Ye H et al. [5]            | CIS multi-material lattice    | Structural compression only                | SEA=126 J/kg/cycle                                                                              | Combined printing                    | >500 cycles                                      | No rate adaptivity reported                                                       |
| Present CMS                | Corrugated cellular structure | Orifice-governed viscous flow              | SED=68.4 8 J/kg Loss                                                                            | Single-step additive manufacturing   | >400 cycles for dynamic testing against multiple | ----                                                                              |

66

67 **Section S4: Phenomenological Model**

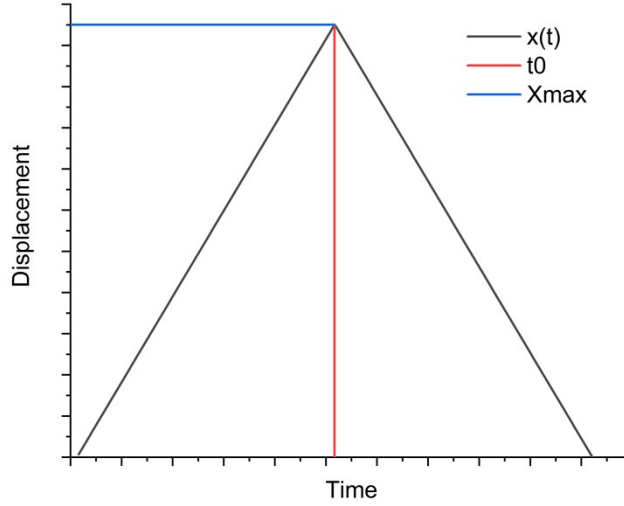

68

69 **Figure S1:** Experimental displacement-time profile

70 **S4.1: Empty Configuration (Coefficients detail)**

71 • The  $k_1 \left( 1 + e^{\frac{-k_1 x^2}{c_1 l |\dot{x}|}} \right) 2 \dot{x}$  describes the linear elastic and plateau regions of the loading curve and  
 72 may be analogous to the Maxwell model, having a nonlinear viscous dashpot connected in  
 73 series with a linear spring element <sup>6,7</sup>, where the fractional exponent indicates the dashpot  
 74 nonlinearity<sup>8</sup>. The parameter  $k_1$  governs the inclination of the linear elastic region, while  
 75 parameter  $c_1$  controls the load level and slope of the plateau region (Figure S2-a,d). Such  
 76 influence (the same as in the article <sup>9</sup> clearly refers to stiffness and viscosity, respectively,  
 77 which may confirm the proposed spring-damper scheme of this part.

78 • The term  $k_2 \left( -1 + e^{\frac{\gamma}{l} x} \right)^4 \dot{x}$  describes the densification region and is analogous to a nonlinear  
 79 spring <sup>9</sup>. The  $\gamma$  is a dimensionless coefficient and together with the bracketed component  
 80 governs the onset position and slope of the densification region, as shown in Figure S2-b, where  
 81  $k_2$  carries the dimensions of the spring stiffness.

82 • The term  $\left( -k_3 + k_4 e^{\frac{-c_2}{k_4 l^s} |\dot{x}|} \right) \dot{x}$  is responsible for improving the accuracy of the model across

83 the full range of compression speed, particularly at low and high speeds. Its form bears analogy  
 84 to the Generalized Maxwell model<sup>10</sup> or Standard Linear Solid model (Maxwell representation)  
 85 <sup>11,12</sup>. The negative sign of the stiffness may be represented as a spring positioned at a defined  
 86 inclination angle, as in the articles<sup>13,14</sup>.

- 87 • The term  $\tau_1 |\dot{x}|^{\gamma}$  governs hysteresis work, a larger value of  $\tau_1$  directly increases the enclosed  
 88 hysteresis loop area (Figure S2-c).

89 A parametric sensitivity analysis was performed to establish the physical correspondence of each  
 90 parameter, and the results are presented in Figure S2. For case (a), the parameter  $c_1$  included in the

$$k_1 \left( 1 + e^{\frac{-k_1 x^2}{c_1 |\dot{x}|}} \right)^2 \dot{x}$$

91 term is a constant corresponding to the value in Table 3, the same for  $k_1$  in (d), for  
 92  $\gamma$  in (b) and  $k_2$  in (e). For cases (a-d), all other parameters except the one under investigation are set  
 93 to zero, isolating each individual parameter contribution to the curve shape. For case (c), all parameters  
 94 except  $\tau_1$  retain their values mentioned in Table 3. For this representation, a single loading velocity  
 95 was selected to have consistency across all cases (a-e). The parameter values were selected as follows:  
 96  $c_1' < c_1'' < c_1''' < c_1'''' < c_1'''''$  (relevant for the rest as well:  $\gamma^{(i)} < \gamma^{(i+1)}$ ,  $\tau_1^{(i)} < \tau_1^{(i+1)}$ ,  $k_1^{(i)} < k_1^{(i+1)}$ ,  
 97  $k_2^{(i)} < k_2^{(i+1)}$ ).

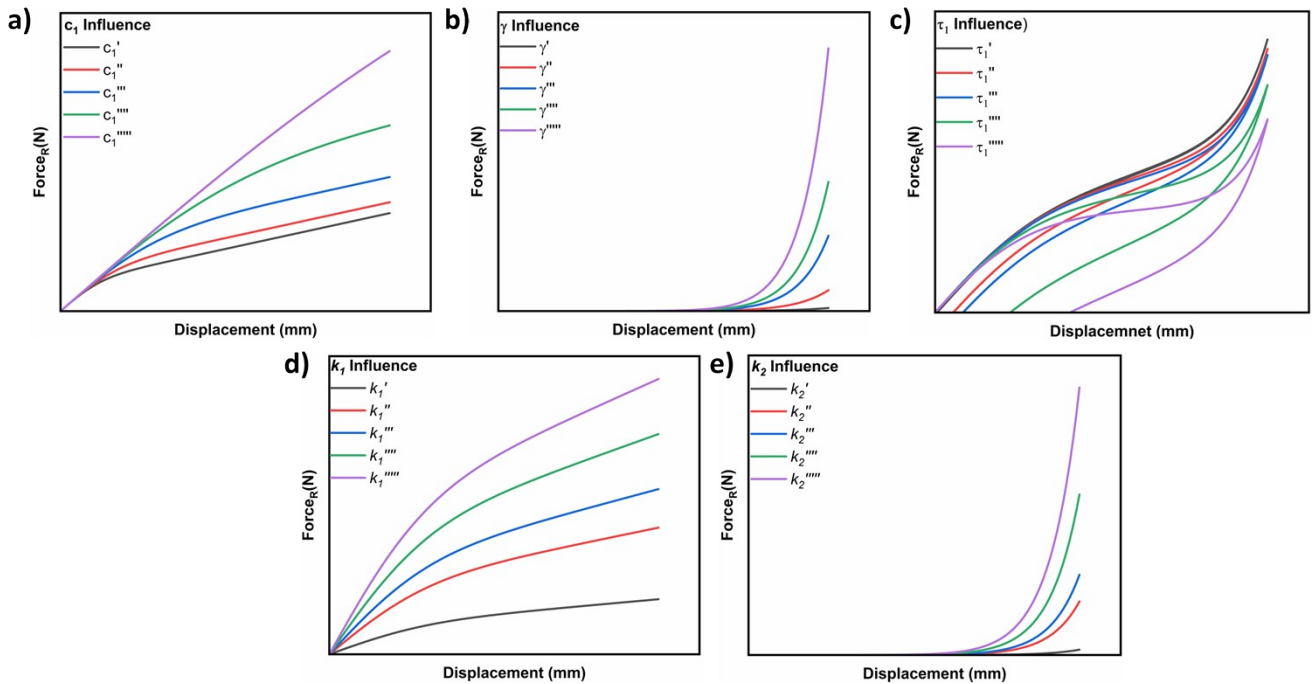

98  
 99 **Figure S2:** Parametric sensitivity of the constitutive model on the force-displacement curve shape (a) influence

100 of  $c_1$ , (b) influence of  $\gamma$ , (c) influence of  $\tau_1$ , (d) influence of  $k_1$ , (e) influence of  $k_2$ .

#### 101 S4.2: Filled Configuration (Coefficients detail)

102 • The term  $\frac{k_5}{l_s}x|\dot{x}|$  primarily governs the hysteresis contribution in the filled configuration,  
 103 probably analogous to a nonlinear spring <sup>15</sup>, where increasing  $k_5$  enhances the hysteresis loop  
 104 area. At the same time, the negative sign of the parameter may indicate an element with  
 105 negative stiffness, which is located at a certain angle <sup>2,13,14</sup>.

106 • The exponential term  $k_6e^{-\frac{\alpha_1}{l_s^2}(x-l_1)^2}$  captures the localized force amplification in the loading  
 107 curve and its influence observed during unloading as well, and is analogous to a part of the  
 108 Carreau-Yasuda model <sup>16</sup>. The coefficient  $k_6$  controls the magnitude of the jump in the curve,  
 109 while  $\alpha_1$  governs its smoothness. These are highly influential parameters and are related to the  
 110 fluid properties, especially  $\alpha_1$  is related to the fluid viscosity. The value  $\alpha_1$ , in this case, is  
 111 equal to the value of (without dimension)  $k_6$  divided by the dynamic viscosity value  $\mu$  value  
 112 squared (in this case, the liquid is Silicon oil  $1.0 \text{ Pa}\cdot\text{s}=1000 \text{ cPs}$  (10Ps)), that is  
 113  $\alpha_1 = \frac{75}{10^2} = 0.75$ .  $l_s$  is the thickness of the corrugated section, which is equal to  $l_s = 1.0 \text{ mm}$ .  
 114 Here the term  $l_1 = h_d - n \cdot h_{gr} + r_0$  defines the onset of the slope in the curve, where  $h_{gr}$  is the  
 115 internal height of one corrugated section part ( $\sim 5.32 \text{ mm}$ ),  $n$  is the number of grooves and  $r_0$   
 116 is the orifice height ( $\sim 0.669 \text{ mm}$ ).

117 • The term  $\left( k_7 + k_8e^{-\frac{\alpha_2}{l_s^2}(x-l_2)^2} \right) \dot{x}$  represents a combination of linear and nonlinear springs  
 118 associated with the progressive engagement of a filled corrugated compliant section. The  
 119 coefficients  $k_8$ ,  $\alpha_2$  and  $l_2$  have the same meaning and influence on the curve as  $k_6$ ,  $\alpha_1$  and  $l_1$ .  
 120 The value (without dimensions)  $\alpha_2 = k_8K$ , where  $K$  coefficient of expansion ( $\sim 0.00096$ ) and  
 121  $l_2 = \sqrt[3]{V_{ch}} - l_a$  ( $\sim 9.4 \text{ mm}$ ), where  $V_{ch}$  is the volume of the chamber, and  $l_a$  is the thickness of  
 122 the accumulator section. The values of the  $k_8$  coefficient depends on the volume of the liquid.  
 123

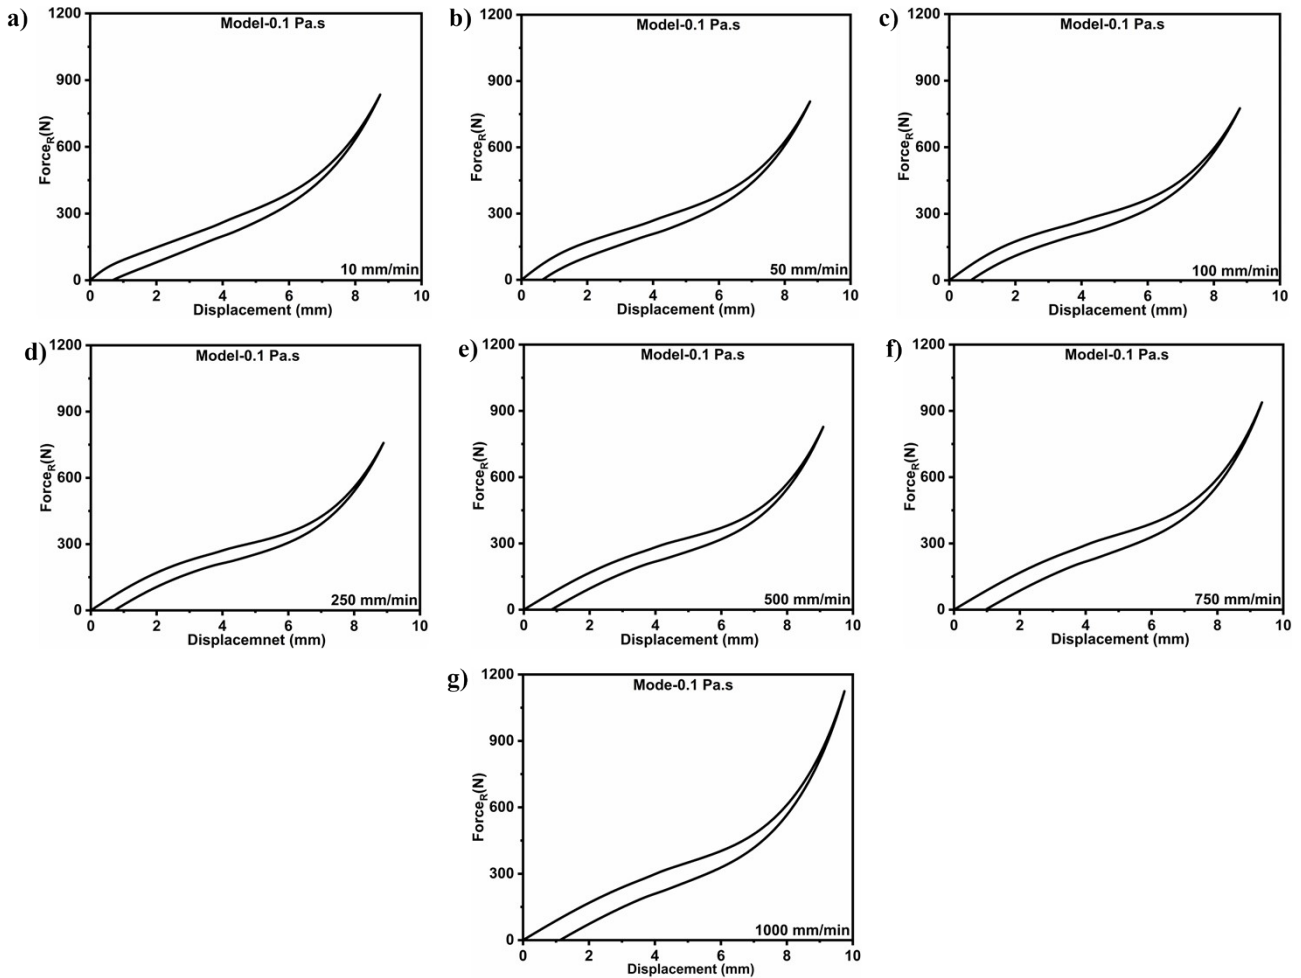

124

125 **Figure S3:** Response of filled configuration model with reduced viscosity across the quasi static test range 10-  
 126 1000 mm/min (a-g).

### 127 **Section S5: Video of Single-step manufacturing approach**

128 The CMS was monolithically fabricated using a multi-extruder printer, wherein a dedicated filament  
 129 extruder and a fluid dispensing extruder operate within a single automated print cycle without human  
 130 intervention. As illustrated in movie S1-DDM-MOV, upon completion of designated lattice layer, the  
 131 filament extruder is parked at its docking site, and the fluid dispensing extruder is automatically  
 132 engaged to deposit a controlled volume of silicon oil within the cellular cavities. Upon completion of  
 133 fluid deposition, the dispensing extruder is docked and the filament extruder resumes structural  
 134 printing of subsequent layers. This automated tool-switching protocol enables the direct encapsulation  
 135 of silicon oil within the CMS during fabrication, eliminating the post-processing, manual filling and  
 136 is fully consistent with the principles of direct digital manufacturing.

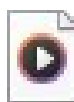

S1-DD-Edited.mp4

137

## 138 **References**

- 139 1 A. Corvi and L. Collini, *Mater. Des.*, DOI:10.1016/j.matdes.2024.113174.
- 140 2 W. Shi, S. Yue, D. Shu, Y. Yuan, Z. Du and G. Gao, *Constr. Build. Mater.*,  
141 DOI:10.1016/j.conbuildmat.2025.140297.
- 142 3 J. Li, Z. Chen, Q. Li, L. Jin and Z. Zhao, *Advanced Science*, DOI:10.1002/advs.202105769.
- 143 4 M. J. Prajapati, A. Kumar and J. Y. Jeng, *Adv. Mater. Technol.*,  
144 DOI:10.1002/ADMT.202500446.
- 145 5 H. Ye, X. Huang, L. Jin, S. Zhou, G. Xie, Z. Hu, R. Li, H. Mo, S. Fang, W.-H. Liao, Q. Ge  
146 and X. Song, *Virtual Phys. Prototyp.*, DOI:10.1080/17452759.2026.2637380.
- 147 6 G. C. Papanicolaou and S. P. Zaoutsos, in *Creep and Fatigue in Polymer Matrix Composites*  
148 *(Second Edition)*, ed. R. M. Guedes, Woodhead Publishing, Second Edition., 2019, pp. 3–59.
- 149 7 R. M. Christensen, *Theory of Viscoelasticity*, 1982, 1–34.
- 150 8 P. A. Lukash, *Moscow: Stroizdat*.
- 151 9 V. Goga and B. Hučko, *Journal of Mechanical Engineering*, 2016, **65**, 5–20.
- 152 10 D. Roylance, *ENGINEERING VISCOELASTICITY*, 2001.
- 153 11 C.-Y. Lin and Y.-C. Lin, *Journal of Experimental and Theoretical Physics*, 2024, **139**, 11–28.
- 154 12 C.-Y. Lin, *Mechanics of Advanced Materials and Structures*, 2024, **31**, 2370–2385.
- 155 13 T. Liu, R. Deng, L. Jin and J. Cai, *Int. J. Mech. Sci.*, 2024, **283**, 109664.
- 156 14 A. Guell Izard, R. Fabian Alfonso, G. McKnight and L. Valdevit, *Mater. Des.*, 2017, **135**, 37–  
157 50.
- 158 15 Solid Mechanics Part I,  
159 [https://pkel015.connect.amazon.auckland.ac.nz/SolidMechanicsBooks/Part\\_I/index.html](https://pkel015.connect.amazon.auckland.ac.nz/SolidMechanicsBooks/Part_I/index.html),  
160 (accessed 18 March 2026).
- 161 16 L. P. Martínez-Padilla, *John Wiley and Sons Inc*, 2024, preprint, DOI: 10.1111/jtxs.12802.

162

163

164

165
